# Supplementary material for: CuS quantum dot modified carbon aerogel as an immobilizer for lithium polysulfides for high-performance lithium–sulfur batteries
Source: Royal Society of Chemistry journal article supplement (doi:10.1039/c6ra11990e), 2016-01-01
Supplement: c6ra11990e1.pdf [file c6ra11990e1.pdf]

## Supporting information

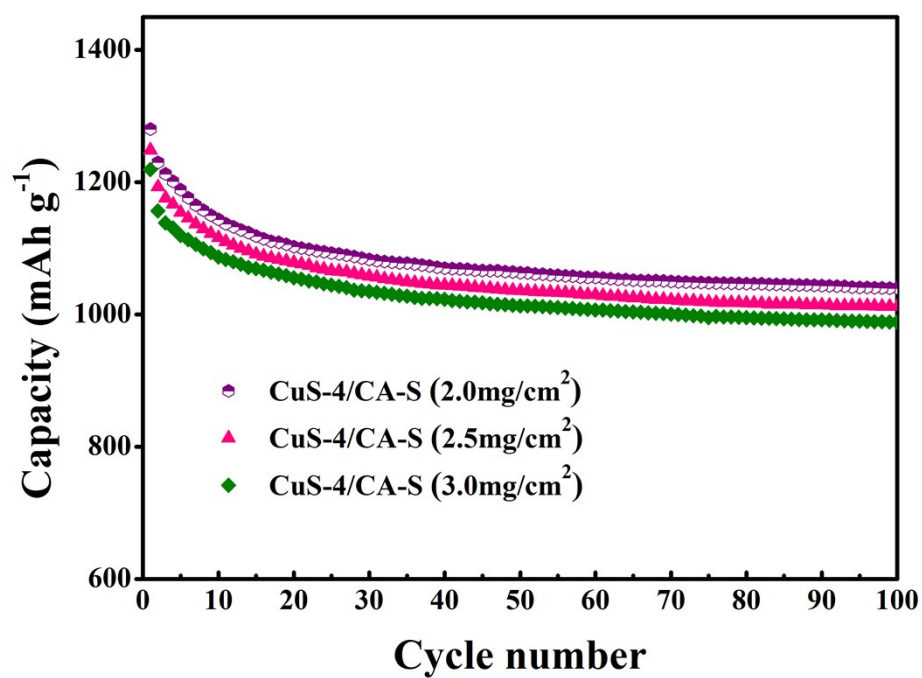

**Fig. S2.** The cycling performances of CuS-4/CA-S with different sulfur loadings at the rate of 0.2 C.
